# Supplementary material for: Aspen Plus® Modeling and Simulation of an Industrial Biomass Direct Liquefaction Process
Source: MDPI journal article supplement (doi:10.3390/fuels4020014), 2023-05-26
Supplement: s1 [file s1]

# Aspen Plus® modeling and simulation of upgraded biofuel production in an industrial biomass direct liquefaction plant

Duarte M. Cecilio <sup>1,2</sup>, Ricardo Gonçalves <sup>1,2</sup>, Maria Joana Neiva Correia <sup>2</sup> and Margarida Mateus <sup>1,2\*</sup>

<sup>1</sup> Secil S.A., Fábrica Secil – Outão, Setúbal, Portugal

<sup>2</sup> CERENA – Centro de Recursos Naturais e Ambiente, Departamento de Engenharia Química, Instituto Superior Técnico, Universidade de Lisboa, Lisboa, Portugal

\* Correspondence: duarte.cecilio@tecnico.ulisboa.pt;

## Appendix A

The kinetic parameters of cellulose were studied by Yan *et al* [1]. In **Table S 1**,

**Table S 2** and

**Table S 3** are shown the values of T and k that have been fitted in the equation 4 in the main text, in order to find the  $k_0$  and Ea values.

**Table S 1.** Reaction rate at different temperatures for cellulose decomposition.

| T (K) | k (s <sup>-1</sup> )  |
|-------|-----------------------|
| 413   | $7.17 \times 10^{-5}$ |
| 433   | $1.77 \times 10^{-4}$ |
| 453   | $7.65 \times 10^{-4}$ |
| 473   | $3.06 \times 10^{-3}$ |
| 493   | $1.13 \times 10^{-2}$ |

**Table S 2.** Reaction rate at different temperatures for glucose decomposition.

| T (K) | k (s <sup>-1</sup> )  |
|-------|-----------------------|
| 413   | $2.27 \times 10^{-4}$ |
| 433   | $5.60 \times 10^{-4}$ |
| 453   | $1.18 \times 10^{-3}$ |
| 473   | $3.39 \times 10^{-3}$ |
| 493   | $7.52 \times 10^{-3}$ |

**Table S 3.** Reaction rate at different temperatures for 5-HMF decomposition.

| T (K) | k (s <sup>-1</sup> )  |
|-------|-----------------------|
| 413   | $9.63 \times 10^{-4}$ |
| 433   | $2.66 \times 10^{-3}$ |
| 453   | $7.70 \times 10^{-3}$ |

|     |                       |
|-----|-----------------------|
| 473 | $2.25 \times 10^{-2}$ |
| 493 | $5.72 \times 10^{-2}$ |

## Appendix B

Simulations was made with different biomass composition. The **Table S 4**, **Table S 5** and **Table S 6** shown the stream results for each simulation.

**Table S 4.** Stream results (kg/h) for simulation with sample 1 of biomass.

| Stream   | FEEDREAC | INSOLVEN | GASPROD | LIQPROD | AQUEOUS | ORGANIC |
|----------|----------|----------|---------|---------|---------|---------|
| 2EH      | 0        | 46.57    | 28.83   | 17.74   | 0.04    | 17.73   |
| H2O      | 12.38    | 4.99     | 21.57   | 0.39    | 7.91    | 8.50    |
| CELL     | 30.96    | 0        | 0       | 11.40   | 0.18    | 0.39    |
| GLUCOSE  | 4.64     | 0        | 0       | 5.15    | 0       | 0.26    |
| GALACT   | 4.64     | 0        | 0       | 0.17    | 0       | 0       |
| COUMARIL | 12.38    | 0        | 0       | 0.35    | 0.01    | 0.01    |
| XYLOSE   | 4.64     | 0        | 0       | 0.17    | 0       | 0.01    |
| ARABIN   | 4.64     | 0        | 0       | 0.17    | 0       | 0       |
| HMF      | 0        | 0.02     | 0.05    | 0.83    | 0.26    | 0.59    |
| LA       | 0        | 1.84     | 2.59    | 15.03   | 1.85    | 13.72   |
| FA       | 0        | 2.44     | 8.42    | 0.28    | 2.59    | 3.39    |
| FURFURAL | 0        | 8.72     | 11.51   | 2.94    | 0.39    | 4.36    |
| PHENOL   | 0        | 6.63     | 7.50    | 10.44   | 0.25    | 10.32   |
| Total    | 74.29    | 71.22    | 80.47   | 65.04   | 13.49   | 59.30   |

**Table S 5.** Stream results (kg/h) for simulation with sample 2 of biomass.

| Stream   | FEEDREAC | INSOLVEN | GASPROD | LIQPROD | AQUEOUS | ORGANIC |
|----------|----------|----------|---------|---------|---------|---------|
| 2EH      | 0        | 46.57    | 31.58   | 14.99   | 0.14    | 14.92   |
| H2O      | 12.38    | 4.14     | 20.32   | 0.37    | 9.13    | 6.96    |
| CELL     | 37.15    | 0        | 0       | 13.68   | 0.27    | 0.42    |
| GLUCOSE  | 4.64     | 0        | 0       | 6.00    | 0       | 0.30    |
| GALACT   | 4.64     | 0        | 0       | 0.17    | 0       | 0       |
| COUMARIL | 6.19     | 0        | 0       | 0.17    | 0       | 0       |
| XYLOSE   | 4.64     | 0        | 0       | 0.17    | 0       | 0.01    |
| ARABIN   | 4.64     | 0        | 0       | 0.17    | 0       | 0       |
| HMF      | 0        | 0.03     | 0.06    | 0.94    | 0.37    | 0.59    |
| LA       | 0        | 1.88     | 3.15    | 16.65   | 3.85    | 13.86   |
| FA       | 0        | 2.63     | 9.42    | 0.31    | 3.53    | 3.28    |
| FURFURAL | 0        | 6.61     | 10.04   | 2.29    | 0.83    | 4.16    |
| PHENOL   | 0        | 1.49     | 1.67    | 5.47    | 0.20    | 5.29    |
| Total    | 74.29    | 63.35    | 76.26   | 61.38   | 18.34   | 49.80   |

**Table S 6.** Stream results (kg/h) for simulation with sample 3 of biomass.

| Stream   | FEEDREAC | INSOLVEN | GASPROD | LIQPROD | AQUEOUS | ORGANIC |
|----------|----------|----------|---------|---------|---------|---------|
| 2EH      | 0        | 46.57    | 31.47   | 15.10   | 0.07    | 15.08   |
| H2O      | 12.38    | 4.86     | 22.69   | 0.36    | 10.31   | 7.34    |
| CELL     | 27.86    | 0        | 0       | 10.26   | 0.20    | 0.31    |
| GLUCOSE  | 6.19     | 0        | 0       | 5.03    | 0       | 0.25    |
| GALACT   | 6.19     | 0        | 0       | 0.22    | 0       | 0       |
| COUMARIL | 9.29     | 0        | 0       | 0.26    | 0.01    | 0       |
| XYLOSE   | 6.19     | 0        | 0       | 0.22    | 0       | 0.01    |
| ARABIN   | 6.19     | 0        | 0       | 0.22    | 0       | 0       |
| HMF      | 0        | 0.03     | 0.06    | 0.86    | 0.35    | 0.54    |
| LA       | 0        | 2.17     | 3.17    | 15.38   | 2.88    | 13.26   |
| FA       | 0        | 2.59     | 8.83    | 0.25    | 3.26    | 2.94    |
| FURFURAL | 0        | 12.16    | 16.34   | 3.46    | 0.79    | 5.50    |
| PHENOL   | 0        | 4.72     | 5.30    | 7.90    | 0.26    | 7.70    |
| Total    | 74.29    | 73.10    | 87.87   | 59.52   | 18.15   | 52.94   |

To calculate the yield and the biomass conversion some assumption was made: The liquefied biomass is composed by HMF, LA, FA, furfural, and phenol, and the non-liquefied biomass by cellulose, glucose, galactose, p-coumaryl alcohol, xylose, and arabinose.

## Appendix C

In sensitivity analysis the yield, conversion, stream flow, and the cooler duty was study. In the next tables the results for each analysis are shown.

**Table S 7.** Results of stream flow (kg/h) at different temperatures.

| Temperature (°C) | FEEDREAC | INSOLVEN | GASPROD | LIQPROD | AQUEOUS | ORGANIC |
|------------------|----------|----------|---------|---------|---------|---------|
| 128              | 74.29    | 49.90    | 27.60   | 96.60   | 9.56    | 71.65   |
| 144              | 74.29    | 55.47    | 45.92   | 83.84   | 10.98   | 67.30   |
| 160              | 74.29    | 71.22    | 80.47   | 65.04   | 13.49   | 59.30   |
| 176              | 74.29    | 119.28   | 147.85  | 45.72   | 14.16   | 50.15   |
| 192              | 74.29    | 269.34   | 319.28  | 24.34   | 46.42   | 0.00    |

**Table S 8.** Results of yield and conversion at different temperatures.

| Temperature (°C) | Yield (%) | Conversion (%) |           |           |                    |           |        |
|------------------|-----------|----------------|-----------|-----------|--------------------|-----------|--------|
|                  |           | Biomass        | Arabinose | Cellulose | p-Coumaryl alcohol | Galactose | Xylose |
| 128              | 37.66     | 45.00          | 91.62     | 13.22     | 92.82              | 91.62     | 91.62  |
| 144              | 48.63     | 55.94          | 94.55     | 34.88     | 95.55              | 94.57     | 94.57  |

|     |       |       |       |       |       |       |       |
|-----|-------|-------|-------|-------|-------|-------|-------|
| 160 | 64.48 | 71.89 | 96.37 | 63.18 | 97.17 | 96.40 | 96.40 |
| 176 | 77.61 | 85.20 | 97.49 | 83.50 | 98.14 | 97.56 | 97.56 |
| 192 | 84.88 | 92.72 | 97.29 | 93.27 | 98.40 | 98.23 | 98.26 |

**Table S 9.** Results of cooler duty at different temperatures.

| Temperature (°C) | Q <sub>cooler</sub> (kW) |
|------------------|--------------------------|
| 413              | -9.60                    |
| 433              | -13.48                   |
| 453              | -21.03                   |
| 473              | -37.54                   |
| 493              | -86.01                   |

**Table S 10.** Results of stream flow (kg/h) at different purges.

| Purge | FEEDREAC | INSOLVEN | GASPROD | LIQPROD | AQUEOUS | ORGANIC |
|-------|----------|----------|---------|---------|---------|---------|
| 0.05  | 74.29    | 74.28    | 82.82   | 65.75   | 13.78   | 60.27   |
| 0.1   | 74.29    | 71.22    | 80.47   | 65.04   | 13.49   | 59.30   |
| 0.15  | 74.29    | 68.59    | 78.43   | 64.44   | 13.20   | 58.48   |
| 0.2   | 74.29    | 66.26    | 76.62   | 63.93   | 12.90   | 57.80   |
| 0.3   | 74.29    | 62.33    | 73.51   | 63.11   | 12.28   | 56.69   |

**Table S 11.** Results of yield and conversion at different fraction purges.

| Purge | Yield (%) | Conversion (%) |           |           |                    |           |        |
|-------|-----------|----------------|-----------|-----------|--------------------|-----------|--------|
|       |           | Biomass        | Arabinose | Cellulose | p-Coumaryl alcohol | Galactose | Xylose |
| 0.05  | 64.49     | 71.89          | 96.38     | 63.18     | 97.17              | 96.40     | 96.40  |
| 0.1   | 64.48     | 71.89          | 96.37     | 63.18     | 97.17              | 96.40     | 96.40  |
| 0.15  | 64.49     | 71.89          | 96.37     | 63.18     | 97.17              | 96.40     | 96.40  |
| 0.2   | 64.48     | 71.89          | 96.37     | 63.18     | 97.17              | 96.40     | 96.40  |
| 0.3   | 64.48     | 71.89          | 96.37     | 63.18     | 97.17              | 96.40     | 96.40  |

**Table S 12.** Results of cooler duty at different fraction purges.

| Purge | Q <sub>cooler</sub> (kW) |
|-------|--------------------------|
| 0.05  | -21.58                   |
| 0.1   | -21.03                   |
| 0.15  | -20.54                   |
| 0.2   | -20.09                   |
| 0.3   | -19.29                   |

**Table S 13.** Results of stream flow (kg/h) at different biomass moisture.

| <b>Q<sub>H2O</sub> (kg/h)</b> | <b>FEEDREAC</b> | <b>INSOLVEN</b> | <b>GASPROD</b> | <b>LIQPROD</b> | <b>AQUEOUS</b> | <b>ORGANIC</b> |
|-------------------------------|-----------------|-----------------|----------------|----------------|----------------|----------------|
| 9.9                           | 71.79           | 68.78           | 73.65          | 66.93          | 9.07           | 63.04          |
| 11.14                         | 73.03           | 70.01           | 77.09          | 65.95          | 11.32          | 61.09          |
| 12.38                         | 74.29           | 71.22           | 80.47          | 65.04          | 13.49          | 59.30          |
| 13.62                         | 75.51           | 72.41           | 83.75          | 64.17          | 15.57          | 57.62          |
| 14.86                         | 76.75           | 73.58           | 86.97          | 63.36          | 17.59          | 56.08          |

**Table S 14.** Results of yield and conversion at different biomass moisture.

| <b>Q<sub>H2O</sub> (kg/h)</b> | <b>Yield (%)</b> | <b>Conversion (%)</b> |                  |                  |                           |                  |               |
|-------------------------------|------------------|-----------------------|------------------|------------------|---------------------------|------------------|---------------|
|                               |                  | <b>Biomass</b>        | <b>Arabinose</b> | <b>Cellulose</b> | <b>p-Coumaryl alcohol</b> | <b>Galactose</b> | <b>Xylose</b> |
| 9.9                           | 64.49            | 71.89                 | 96.38            | 63.18            | 97.17                     | 96.40            | 96.40         |
| 11.14                         | 64.48            | 71.89                 | 96.38            | 63.18            | 97.17                     | 96.40            | 96.40         |
| 12.38                         | 64.48            | 71.89                 | 96.37            | 63.18            | 97.17                     | 96.40            | 96.40         |
| 13.62                         | 64.48            | 71.89                 | 96.37            | 63.18            | 97.17                     | 96.40            | 96.40         |
| 14.86                         | 64.48            | 71.89                 | 96.37            | 63.18            | 97.17                     | 96.40            | 96.40         |

**Table S 15.** Results of cooler duty at different moisture.

| <b>Q<sub>H2O</sub> (kg/h)</b> | <b>Q<sub>cooler</sub> (kW)</b> |
|-------------------------------|--------------------------------|
| 9.9                           | -18.68                         |
| 11.14                         | -19.86                         |
| 12.38                         | -21.03                         |
| 13.62                         | -22.19                         |
| 14.86                         | -23.33                         |

**Table S 16.** Results of stream flow (kg/h) at different biomass/solvent ratio.

| <b>Biomass/solvent ratio</b> | <b>FEEDREAC</b> | <b>INSOLVEN</b> | <b>GASPROD</b> | <b>LIQPROD</b> | <b>AQUEOUS</b> | <b>ORGANIC</b> |
|------------------------------|-----------------|-----------------|----------------|----------------|----------------|----------------|
| 1.06                         | 74.27           | 83.47           | 87.58          | 70.16          | 12.24          | 64.37          |
| 1.2                          | 74.27           | 76.38           | 83.44          | 67.21          | 12.96          | 61.41          |
| 1.33                         | 74.27           | 71.22           | 80.46          | 65.03          | 13.49          | 59.29          |
| 1.46                         | 74.27           | 66.95           | 78.01          | 63.22          | 13.92          | 57.54          |
| 1.6                          | 74.27           | 63.18           | 75.86          | 61.60          | 14.29          | 56.02          |

**Table S 17.** Results of yield and conversion at different biomass/solvent ratio.

| <b>Biomass/solvent ratio</b> | <b>Yield (%)</b> | <b>Conversion (%)</b> |                  |                  |                           |                  |               |
|------------------------------|------------------|-----------------------|------------------|------------------|---------------------------|------------------|---------------|
|                              |                  | <b>Biomass</b>        | <b>Arabinose</b> | <b>Cellulose</b> | <b>p-Coumaryl alcohol</b> | <b>Galactose</b> | <b>Xylose</b> |
| 1.06                         | 63.17            | 70.54                 | 96.09            | 61.35            | 96.95                     | 96.12            | 96.12         |

|      |       |       |       |       |       |       |       |
|------|-------|-------|-------|-------|-------|-------|-------|
| 1.2  | 63.89 | 71.27 | 96.25 | 62.35 | 97.07 | 96.28 | 96.28 |
| 1.33 | 64.48 | 71.89 | 96.37 | 63.18 | 97.17 | 96.40 | 96.40 |
| 1.46 | 64.98 | 72.39 | 96.47 | 63.87 | 97.25 | 96.50 | 96.50 |
| 1.6  | 65.45 | 72.88 | 96.57 | 64.53 | 97.33 | 96.60 | 96.60 |

**Table S 18.** Results of cooler duty at different biomass/solvent ratio.

| <b>Biomass/solvent ratio</b> | <b>Q<sub>cooler</sub> (kW)</b> |
|------------------------------|--------------------------------|
| 1.06                         | -22.42                         |
| 1.2                          | -21.61                         |
| 1.33                         | -21.03                         |
| 1.46                         | -20.56                         |
| 1.6                          | -20.14                         |

**Table S 19.** Ea values (kJ/mol) for each deviation.

| <b>Reaction</b>    | <b>0%</b> | <b>10%</b> | <b>20%</b> | <b>-10%</b> | <b>-20%</b> |
|--------------------|-----------|------------|------------|-------------|-------------|
| Arabinose          | 40.49     | 44.54      | 48.59      | 36.44       | 32.39       |
| Cellulose          | 109.35    | 120.28     | 131.22     | 98.41       | 87.48       |
| p-Coumaryl alcohol | 44.31     | 48.74      | 53.17      | 39.88       | 35.45       |
| Galactose          | 40.49     | 44.54      | 48.59      | 36.44       | 32.39       |
| Glucose            | 74.37     | 81.80      | 89.24      | 66.93       | 59.49       |
| HMF                | 87.13     | 95.84      | 104.56     | 78.42       | 69.70       |
| Xylose             | 40.49     | 44.54      | 48.59      | 36.44       | 32.39       |

**Table S 20.** Results of stream flow (kg/h) at different Ea.

| <b>Deviation (%)</b> | <b>FEEDREAC</b> | <b>INSOLVEN</b> | <b>GASPROD</b> | <b>LIQPROD</b> | <b>AQUEOUS</b> | <b>ORGANIC</b> |
|----------------------|-----------------|-----------------|----------------|----------------|----------------|----------------|
| -20                  | 74.27           | 80.61           | 99.59          | 55.29          | 11.26          | 74.36          |
| -10                  | 74.27           | 78.93           | 96.76          | 56.43          | 11.79          | 72.39          |
| 0                    | 74.27           | 71.22           | 80.46          | 65.03          | 13.49          | 59.29          |
| 10                   | 74.27           | 64.62           | 62.64          | 76.25          | 12.78          | 47.18          |
| 20                   | 74.27           | 59.74           | 54.23          | 79.78          | 12.42          | 43.57          |

**Table S 21.** Results of yield and conversion at different Ea.

| <b>Deviation (%)</b> | <b>Yield (%)</b> | <b>Conversion (%)</b> |                  |                  |                           |                  |               |
|----------------------|------------------|-----------------------|------------------|------------------|---------------------------|------------------|---------------|
|                      |                  | <b>Biomass</b>        | <b>Arabinose</b> | <b>Cellulose</b> | <b>p-Coumaryl alcohol</b> | <b>Galactose</b> | <b>Xylose</b> |
| -20                  | 91.50            | 99.55                 | 99.60            | 99.87            | 99.75                     | 99.61            | 99.61         |
| -10                  | 88.47            | 96.36                 | 98.79            | 97.28            | 99.16                     | 98.80            | 98.80         |
| 0                    | 64.49            | 71.89                 | 96.37            | 63.18            | 97.17                     | 96.40            | 96.40         |

|    |       |       |       |      |       |       |       |
|----|-------|-------|-------|------|-------|-------|-------|
| 10 | 34.61 | 41.96 | 89.63 | 7.61 | 90.95 | 89.70 | 89.70 |
| 20 | 25.49 | 31.99 | 73.76 | 0.39 | 74.61 | 73.87 | 73.88 |

**Table S 22.** Results of cooler duty at different Ea.

| <b>Deviation (%)</b> | <b>Q<sub>cooler</sub> (kW)</b> |
|----------------------|--------------------------------|
| -20                  | -25.14                         |
| -10                  | -24.50                         |
| 0                    | -21.03                         |
| 10                   | -17.41                         |
| 20                   | -15.48                         |

## References

1. Yan, L.; Greenwood, A.A.; Hossain, A.; Yang, B. A Comprehensive Mechanistic Kinetic Model for Dilute Acid Hydrolysis of Switchgrass Cellulose to Glucose, 5-HMF and Levulinic Acid. *RSC Adv* **2014**, *4*, 23492–23504, doi:10.1039/C4RA01631A.
